# Supplementary material
Source: PubMed Central journal article supplement (PMC4589477)

## Supporting Information:

### Supplementary Figure Legend:

Supplementary Figure 1: Additional correlates of baseline cytokine/chemokine levels. (A) Association of Log<sub>10</sub>HCV viral load at baseline with Log<sub>10</sub>IP-10. (B) Association of Log<sub>10</sub>MIP-1β with age (years). P-values and adjusted R<sup>2</sup> were determined by univariable linear regression analysis.

Supplementary Table 1. Correlates of sustained virologic response (SVR) in patients without cirrhosis.

|                                               |     | Relapse       | SVR           | P-value           | OR (95% CI) <sup>b</sup> |                                |
|-----------------------------------------------|-----|---------------|---------------|-------------------|--------------------------|--------------------------------|
|                                               |     |               |               |                   | Unadjusted               | Adjusted                       |
| BMI                                           | <30 | 21 (31.8%)    | 23 (34.8%)    | 0.18 <sup>c</sup> | 1 [Reference]            | --                             |
|                                               | ≥30 | 6 (9.1%)      | 16 (24.2%)    |                   | 2.44 (0.831, 7.86)       |                                |
| Log <sub>10</sub> IP-10 baseline <sup>f</sup> |     | 2.245 (0.286) | 2.42 (0.417)  | 0.06 <sup>d</sup> | 1.15 (1.00, 1.23)        | 1.28 (1.06, 1.62) <sup>*</sup> |
| Log <sub>10</sub> IP-10 week 1 <sup>f</sup>   |     | 1.905 (0.182) | 2.066 (0.386) | 0.03 <sup>e</sup> | 1.22 (1.01, 1.54)        | --                             |
| Log <sub>10</sub> MIP1β week 1 <sup>f</sup>   |     | 1.119 (0.174) | 1.192 (0.253) | 0.19 <sup>d</sup> | 1.17 (0.93, 1.49)        | --                             |
| Log <sub>10</sub> IP-10 week 2 <sup>f</sup>   |     | 1.871 (0.147) | 2.052 (0.401) | 0.01 <sup>e</sup> | 1.26 (1.04, 1.63)        | --                             |
| Log <sub>10</sub> MIP1β week 2 <sup>f</sup>   |     | 1.112 (0.144) | 1.228 (0.253) | 0.02 <sup>e</sup> | 1.31 (1.02, 1.73)        | --                             |
| Δ Log <sub>10</sub> MIP1β w0-2                |     | 0.198 (0.218) | 0.108 (0.245) | 0.13              | 0.84 (0.65, 1.04)        | 0.72 (0.53, 0.94) <sup>*</sup> |

<sup>a</sup> Variables meeting p-value <0.2 threshold for inclusion in initial multivariable analysis are reported. Percentages have been rounded and might not total 100.

<sup>b</sup> Univariable (unadjusted) and multivariable (adjusted) ORs are presented.

<sup>c</sup> P-values calculated by Fisher Exact Test

<sup>d</sup> P-values calculated by independent sample *t* tests

<sup>e</sup> P-values calculated by Wilcoxon rank sum tests

<sup>f</sup> Odds ratios were calculated per 0.1 unit increase

BMI, Body Mass Index

"--" indicates variables that were dropped from the exploratory multivariable model

Mean and (SD) noted under Relapse and SVR for all continuous variables

Number and (Percentage) noted for all categorical variables

Supplementary Table 2. Correlates of SVR in patients with genotype 2 HCV infection

|                                                 |              | Relapse     | SVR         | P-value           | OR (95% CI) <sup>a</sup> |                                |
|-------------------------------------------------|--------------|-------------|-------------|-------------------|--------------------------|--------------------------------|
|                                                 |              |             |             |                   | Unadjusted               | Adjusted                       |
| Age                                             |              | 49.4 (14.3) | 54.6 (11.0) | 0.16 <sup>c</sup> | 1.04 (0.99, 1.09)        | --                             |
| Sex                                             | F            | 2 (3.8%)    | 16 (30.2%)  | 0.10 <sup>b</sup> | 1 [Reference]            | --                             |
|                                                 | M            | 12 (22.6%)  | 23 (43.4%)  |                   | 0.24 (0.03, 1.04)        |                                |
| Ethnicity                                       | Hispanic     | 4 (7.5%)    | 4 (7.5%)    | 0.19 <sup>b</sup> | 1 [Reference]            | --                             |
|                                                 | Not Hispanic | 10 (18.9%)  | 35 (66.0%)  |                   | 3.5 (0.72, 17.4)         |                                |
| Treatment Duration (wks)                        | 12           | 12 (22.6%)  | 38 (71.7%)  | 0.17 <sup>b</sup> | 1 [Reference]            | --                             |
|                                                 | 16           | 2 (3.77%)   | 1 (1.89%)   |                   | 0.16 (0.01, 1.79)        |                                |
| Log <sub>10</sub> HCV RNA baseline <sup>e</sup> |              | 6.73 (0.67) | 6.32 (0.92) | 0.14 <sup>c</sup> | 0.52 (0.19, 1.15)        | 0.49 (0.17, 1.14)              |
| Log <sub>10</sub> IP10 week 1 <sup>d</sup>      |              | 1.93 (0.30) | 2.11 (0.34) | 0.08 <sup>c</sup> | 1.23 (0.99, 1.63)        | --                             |
| Log <sub>10</sub> MIP1β week 1 <sup>d</sup>     |              | 1.09 (0.22) | 1.26 (0.26) | 0.02 <sup>c</sup> | 1.43 (1.06, 2.08)        | 1.46 (1.07, 2.15) <sup>*</sup> |
| Log <sub>10</sub> MIP1β week 2 <sup>d</sup>     |              | 1.13 (0.20) | 1.27 (0.21) | 0.04 <sup>c</sup> | 1.40 (1.02, 2.05)        | --                             |

Variables meeting p-value <0.2 threshold for inclusion in initial multivariable analysis are reported. Percentages have been rounded and might not total 100.

<sup>a</sup> Univariable (unadjusted) and multivariable (adjusted) ORs are presented.

<sup>b</sup> P-values calculated by Fisher Exact Test

<sup>c</sup> P-values calculated by independent sample *t* tests

<sup>d</sup> Odds ratios were calculated per 0.1 unit increase

<sup>e</sup> Odds ratio was calculated per 1 log<sub>10</sub> increase in viral load

\* p ≤ 0.05; \*\* p <0.01; \*\*\* p <0.001; calculated in final multivariable model

"--" indicates variables that were dropped from the exploratory multivariable model

Mean and (SD) noted under Relapse and SVR for all continuous variables

Number and (Percentage) noted for all categorical variables

Supplementary Table 3. Correlates of SVR in treatment experienced patients

|                                              |          | Relapse     | SVR         | P-value           | OR (95% CI) <sup>a</sup> |                     |
|----------------------------------------------|----------|-------------|-------------|-------------------|--------------------------|---------------------|
|                                              |          |             |             |                   | Unadjusted               | Adjusted            |
| Treatment Duration (wks)                     | 12       | 25 (38.5%)  | 21 (32.3%)  | 0.06 <sup>b</sup> | 1 [Reference]            | 1 [Reference]       |
|                                              | 16       | 5 (7.7%)    | 14 (21.5%)  |                   | 3.33 (1.08, 11.7)        | 6.53 (1.52, 36.7) * |
| Clinical Trial                               | FUSION   | 16 (24.6%)  | 25 (38.5%)  | 0.20 <sup>b</sup> | 1 [Reference]            | --                  |
|                                              | POSITRON | 14 (21.5%)  | 10 (15.4%)  |                   | 0.46 (0.16, 1.26)        |                     |
| Log <sub>10</sub> MCP1 baseline <sup>d</sup> |          | 1.59 (0.17) | 1.54 (0.13) | 0.19 <sup>c</sup> | 0.79 (0.55, 1.11)        | 0.51 (0.26, 0.88) * |
| Log <sub>10</sub> MIP1β week 1 <sup>d</sup>  |          | 1.13 (0.20) | 1.23 (0.19) | 0.06 <sup>c</sup> | 1.29 (1.00, 1.75)        | 1.62 (1.06, 2.68) * |
| Log <sub>10</sub> MIP1β week 2 <sup>d</sup>  |          | 1.13 (0.17) | 1.20 (0.19) | 0.13 <sup>c</sup> | 1.25 (0.95, 1.71)        | --                  |
| Δ Log <sub>10</sub> MIP1β w0-1 <sup>d</sup>  |          | 0.14 (0.19) | 0.06 (0.21) | 0.10 <sup>c</sup> | 0.80 (0.60, 1.03)        | 1.54 (0.88, 2.90)   |
| Δ Log <sub>10</sub> MIP1β w0-2 <sup>d</sup>  |          | 0.15 (0.17) | 0.09 (0.16) | 0.13 <sup>c</sup> | 0.79 (0.57, 1.07)        | 0.67 (0.37, 1.13)   |
| Δ Log <sub>10</sub> MCP1 w0-2 <sup>d</sup>   |          | 0.10 (0.13) | 0.04 (0.16) | 0.14 <sup>c</sup> | 0.77 (0.52, 1.09)        | --                  |

Variables meeting p-value <0.2 threshold for inclusion in initial multivariable analysis are reported. Percentages have been rounded and might not total 100.

<sup>a</sup> Univariable (unadjusted) and multivariable (adjusted) ORs are presented.

<sup>b</sup> P-values calculated by Fisher Exact Test

<sup>c</sup> P-values calculated by independent sample *t* tests

<sup>d</sup> Odds ratios were calculated per 0.1 unit increase

\* p ≤ 0.05; \*\* p <0.01; \*\*\* p <0.001; calculated in final multivariable model

"--" indicates variables that were dropped from the exploratory multivariable model

Mean and (SD) noted under Relapse and SVR for all continuous variables

Supplementary Table 4. Correlates of SVR in treatment naive patients

|                                               |   | Relapse      | SVR         | P-value            | OR (95% CI) <sup>a</sup> |                     |
|-----------------------------------------------|---|--------------|-------------|--------------------|--------------------------|---------------------|
|                                               |   |              |             |                    | Unadjusted               | Adjusted            |
| Age                                           |   | 51.2 (9.16)  | 54.5 (9.33) | 0.11 <sup>c</sup>  | 1.03 (0.98, 1.10)        | --                  |
| Sex                                           | F | 7 (10.6%)    | 22 (33.3%)  | 0.13 <sup>b</sup>  | 1 [Reference]            | 1 [Reference]       |
|                                               | M | 16 (24.2%)   | 21 (31.8%)  |                    | 0.42 (0.14, 1.19)        | 0.40 (0.11, 1.30)   |
| Log <sub>10</sub> IP-10 baseline <sup>d</sup> |   | 2.21 (0.24)  | 2.46 (0.40) | 0.008 <sup>c</sup> | 1.29 (1.08, 1.62)        | 1.37 (1.08, 1.83) * |
| Log <sub>10</sub> MIP1β baseline <sup>d</sup> |   | 1.28 (0.18)  | 1.38 (0.21) | 0.06 <sup>c</sup>  | 1.31 (1.00, 1.77)        | --                  |
| Log <sub>10</sub> IP-10 week 1 <sup>d</sup>   |   | 1.90 (0.18)  | 2.14 (0.38) | 0.001 <sup>c</sup> | 1.37 (1.11, 1.82)        | --                  |
| Log <sub>10</sub> MIP1β week 1 <sup>d</sup>   |   | 1.09 (0.16)  | 1.24 (0.26) | 0.005 <sup>c</sup> | 1.37 (1.07, 1.82)        | --                  |
| Log <sub>10</sub> IP-10 week 2 <sup>d</sup>   |   | 1.88 (0.14)  | 2.11 (0.40) | 0.002 <sup>c</sup> | 1.34 (1.08, 1.79)        | --                  |
| Log <sub>10</sub> MIP1β week 2 <sup>d</sup>   |   | 1.10 (0.13)  | 1.26 (0.27) | 0.001 <sup>c</sup> | 1.40 (1.10, 1.86)        | 1.42 (1.07, 2.00) * |
| Δ Log <sub>10</sub> IL-18 w1-2 <sup>d</sup>   |   | -0.02 (0.12) | 0.02 (0.08) | 0.16 <sup>c</sup>  | 1.47 (0.86, 2.72)        | --                  |

Variables meeting p-value <0.2 threshold for inclusion in initial multivariable analysis are reported. Percentages have been rounded and might not total 100.

<sup>a</sup> Univariable (unadjusted) and multivariable (adjusted) ORs are presented.

<sup>b</sup> P-values calculated by Fisher Exact Test

<sup>c</sup> P-values calculated by independent sample *t* tests

<sup>d</sup> Odds ratios were calculated per 0.1 unit increase

\* p ≤ 0.05; \*\* p <0.01; \*\*\* p <0.001; calculated in final multivariable model

"--" indicates variables that were dropped from the exploratory multivariable model

Mean and (SD) noted under Relapse and SVR for all continuous variables

Number and (Percentage) noted for all categorical variables

Supplementary Table 5. Correlates of SVR in patients with GT3 infection and cirrhosis who previously failed IFN therapy

|                                                 | Relapse  | SVR                    | P-value                 | OR (95% CI) <sup>a</sup> |                                    |                                        |
|-------------------------------------------------|----------|------------------------|-------------------------|--------------------------|------------------------------------|----------------------------------------|
|                                                 |          |                        |                         | Unadjusted               | Adjusted                           |                                        |
| Treatment Duration (wks)                        | 12<br>16 | 6 (22.2%)<br>3 (11.1%) | 5 (18.5%)<br>13 (48.1%) | 0.10 <sup>b</sup>        | 1 [Reference]<br>5.20 (0.99, 33.5) | 1 [Reference]<br>37.8 (1.38, 10,853) * |
| Log <sub>10</sub> HCV RNA baseline <sup>e</sup> |          | 5.32 (0.94)            | 6.43 (0.67)             | 0.01 <sup>c</sup>        | 1.18 (1.06, 1.36)                  | 4.96 (1.04, 52.7) *                    |
| Log <sub>10</sub> MCP1 baseline <sup>d</sup>    |          | 1.65 (0.12)            | 1.56 (0.15)             | 0.10 <sup>c</sup>        | 0.56 (0.24, 1.06)                  | 0.16 (0.008, 0.65) **                  |
| Log <sub>10</sub> MIP1β week 1 <sup>d</sup>     |          | 1.15 (0.17)            | 1.28 (0.22)             | 0.15 <sup>c</sup>        | 1.45 (0.92, 2.72)                  | 2.38 (1.11, 8.46) *                    |
| Log <sub>10</sub> MCP1 week 2 <sup>d</sup>      |          | 1.57 (0.15)            | 1.46 (0.16)             | 0.11 <sup>c</sup>        | 0.63 (0.32, 1.08)                  | --                                     |

Variables meeting p-value <0.2 threshold for inclusion in initial multivariable analysis are reported. Percentages have been rounded and might not total 100.

<sup>a</sup> Univariable (unadjusted) and multivariable (adjusted) ORs are presented.

<sup>b</sup> P-values calculated by Fisher Exact Test

<sup>c</sup> P-values calculated by independent sample *t* tests

<sup>d</sup> Odds ratios were calculated per 0.1 unit increase

<sup>e</sup> Odds ratio was calculated per 1 log<sub>10</sub> increase in viral load

\* p ≤ 0.05; \*\* p <0.01; \*\*\* p <0.001; calculated in final multivariable model

"--" indicates variables that were dropped from the exploratory multivariable model

Mean and (SD) noted under Relapse and SVR for all continuous variables

Number and (Percentage) noted for all categorical variables

Supplementary Table 6. Correlates of SVR in all patients who failed IFN therapy regardless of HCV genotype and liver histology

|                                                 | Relapse  | SVR                     | P-value                  | OR (95% CI) <sup>a</sup> |                                    |                     |
|-------------------------------------------------|----------|-------------------------|--------------------------|--------------------------|------------------------------------|---------------------|
|                                                 |          |                         |                          | Unadjusted               | Adjusted                           |                     |
| Treatment Duration (wks)                        | 12<br>16 | 11 (26.8%)<br>5 (12.2%) | 11 (26.8%)<br>14 (34.1%) | 0.20 <sup>b</sup>        | 1 [Reference]<br>2.80 (0.77, 11.2) | --                  |
| Log <sub>10</sub> HCV RNA baseline <sup>e</sup> |          | 5.95 (1.15)             | 6.41 (0.77)              | 0.18 <sup>c</sup>        | 1.67 (0.86, 3.50)                  | --                  |
| Log <sub>10</sub> MIP1β week 1 <sup>d</sup>     |          | 1.11 (0.22)             | 1.26 (0.20)              | 0.03 <sup>c</sup>        | 1.49 (1.05, 2.40)                  | 1.49 (1.05, 2.40) * |
| Log <sub>10</sub> MIP1β week 2 <sup>d</sup>     |          | 1.10 (0.16)             | 1.20 (0.22)              | 0.14 <sup>c</sup>        | 1.31 (0.93, 2.00)                  | --                  |

Variables meeting p-value <0.2 threshold for inclusion in initial multivariable analysis are reported. Percentages have been rounded and might not total 100.

<sup>a</sup> Univariable (unadjusted) and multivariable (adjusted) ORs are presented.

<sup>b</sup> P-values calculated by Fisher Exact Test

<sup>c</sup> P-values calculated by independent sample *t* tests

<sup>d</sup> Odds ratios were calculated per 0.1 unit increase

<sup>e</sup> Odds ratio was calculated per 1 log<sub>10</sub> increase in viral load

\* p ≤ 0.05; \*\* p <0.01; \*\*\* p <0.001; calculated in final multivariable model

"--" indicates variables that were dropped from the exploratory multivariable model

Mean and (SD) noted under Relapse and SVR for all continuous variables

Number and (Percentage) noted for all categorical variables

**A**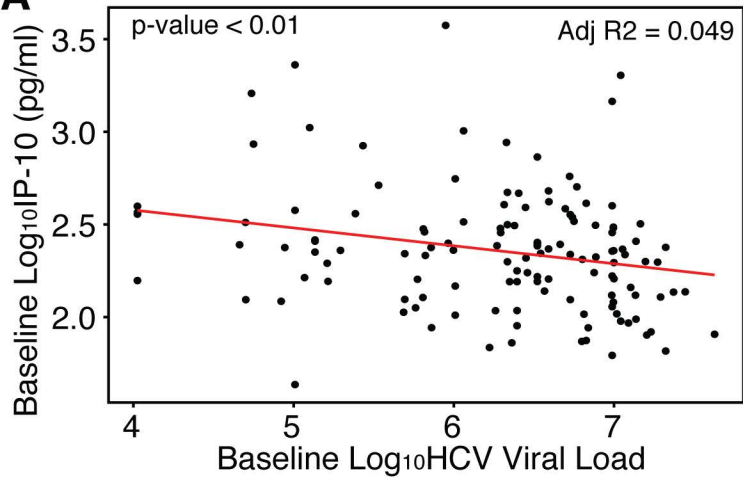**B**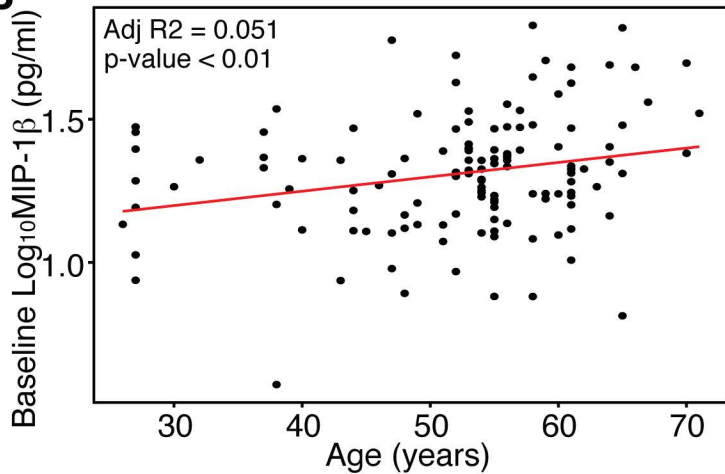

Supplement: NIHMS706784-supplement-Supp_TableS1-S5___FigureS1-S5___FigureS1.pdf [file NIHMS706784-supplement-Supp_TableS1-S5___FigureS1-S5___FigureS1.pdf]
